# Supplementary material
Source: PubMed Central journal article supplement (PMC6527435)
Supplement: supp_7.2.E351_2018-0086-original-submission.pdf [file supp_7.2.E351_2018-0086-original-submission.pdf]

## Getting Older? Where you live matters: Regional variations of care in home care and long-term care

**Paul C. Hebert(1, 2), Anne Morinville(2), Andrew Costa(3), George Heckman(4,5), John Hirdes(5)**

(1) Département de Médecine, Université de Montréal et Centre hospitalier de l'Université de Montréal, Montréal, Québec, Canada. (2) Centre de Recherche du Centre Hospitalier de l'Université de Montréal, Montréal, Québec, Canada. (3) Department of Medicine, McMaster University, Hamilton, Ontario, Canada. (4) Research Institute for Ageing, School of Public Health and Health Systems, University of Waterloo, Waterloo, Ontario, Canada, (5) School of Public Health and Health Systems, University of Waterloo, Waterloo, Ontario, Canada.

**Please address all correspondence to :**

Paul C. Hebert **MD MHSc FRCPC FCAHS**  
Département de Médecine, CHUM  
Centre hospitalier de l'Université de Montréal  
850, St-Denis, 1e étage, local S01-120  
Montréal, Québec, H2X 0A9  
Phone: (514) 890-8000, poste 26620  
Fax: (514) 412-7594  
Internet: paul.hebert.chum@ssss.gouv.qc.ca

**Word count (without abstract): 2578**

**Key words:** interRAI; multistate transitions; assessment; nursing homes; hospital transfers; patient-centered care; frailty

**Acknowledgements:** *This study was funded by a Strategic Impact Grant from the Canadian Frailty Network (SIG2014F-31). The authors wish to thank Jonathan Chen, Micaela Jantzi and Veronica Jung for work on the data analysis as well as Julie Koreck and Marie-Noël Nadeau for administrative assistance. George Heckman is supported by the Schlegel Chair in Geriatric Medicine. Andrew Costa is support by the Schlegel Chair in Clinical Epidemiology & Aging and McMaster University.*

**ABSTRACT (word count: 250)**

**Background:** Many aging adults undergo progressive loss of autonomy and increasingly complex medical needs that lead to numerous transitions between different care settings. We compared these transitions in three Canadian provinces to identify potential care gaps.

**Methods:** We examined transitions from home care services and long-term care to different possible end states (change of health status [using the Changes in Health, End-Stage Disease, and Signs and Symptoms (CHESS) Scale], transfer to hospital or other care settings, death) using standardized interRAI assessments linked to hospital records from 2010 to 2016. Multistate modelling was used to adjust for patients with complex health and transitions in care.

**Results:** We report data for 254,664 individuals in home and 162,045 residents from long-term care programs. Compared to Ontario, individuals requiring home care services in Alberta [at CHESS=0, the adjusted odds ratio was of 2.08 (1.92-2.24)] and British Columbia [at CHESS=0, adjusted odds ratio of 1.46 (1.39-1.54)], had increased odds of being hospitalized regardless of the underlying severity of illness. Residents in long-term care in Alberta (at CHESS=0, odds ratio of 0.38 [0.35-0.40]) and British Columbia (at CHESS=0, odds ratio of 0.44 [0.42-0.46]) had less than half the odds of being transferred to hospital, independent of all other factors, when compared to Ontario.

**Interpretation:** Significant variations in transfer rates were observed between provinces, even after controlling for individual patient characteristics. These results suggest that transfers to hospital are largely driven by healthcare policies, healthcare professional practice patterns and available infrastructure rather than individual patient needs.

## Introduction (417)

Many older adults embark on a journey of increasing comorbidity burden, progressive frailty, and functional decline that takes them from full independence, to receiving assistance in the community, to full care, eventual palliation and death (often in institutional settings). Poorly executed transitions, inconsistencies in assessments among practitioners, and interventions that are often not tailored to the person's needs and expressed goals, available resources and health care settings puts frail older adults at risk of adverse outcomes<sup>1</sup>. Indeed, poor transitions can lead to deleterious consequences such as premature transfers from home care to nursing homes, unnecessary transfers to hospital emergency departments, and inadequate end-of-life care planning.

Frail home care clients with complex comorbidities are especially vulnerable to care fragmentation. Effective chronic disease management requires the targeted delivery of multiple care components and patient self-care coaching by a coordinated multidisciplinary care team. These programs should be efficiently deployed as integrated care processes that respect individual patient needs and goals<sup>2-4</sup>. Jurisdictional differences in these programs, resources, their structure and care provider training and communication may result in distinct patterns of care. Admissions to hospitals through Emergency Departments, often for anticipated or preventable, are driven by the complexity and frailty of these individuals<sup>5-7</sup>. Deteriorations in overall health during acute care hospitalization often result in admission to a long-term care facility<sup>8</sup>, if not death.

Long-term care residents, many already very frail, are far from a uniform group. While individual prognoses, care needs, values and expectations may vary substantially, clinical deterioration and death can be anticipated for most long-term care residents. In fact, life expectancy once admitted to a long-term care

1  
2  
3  
4  
5  
6  
7  
8  
9  
10  
11  
12  
13  
14  
15  
16  
17  
18  
19  
20  
21  
22  
23  
24  
25  
26  
27  
28  
29  
30  
31  
32  
33  
34  
35  
36  
37  
38  
39  
40  
41  
42  
43  
44  
45  
46  
47  
48  
49  
50  
51  
52  
53  
54  
55  
56  
57  
58  
59  
60

facility is relatively short, with approximately 30-50% dying each year<sup>9</sup> - an outcome comparable to many aggressive cancers<sup>10</sup>. Notably, use of emergency care and acute care facilities remains elevated, often for potentially avoidable reasons<sup>11</sup>, and often in disaccord with resident wishes. End of life is one of the most sensitive and difficult situations to manage and - for many - occurs in long-term care, yet a substantial proportion of long-term care residents still die in hospital<sup>12</sup>.

If the ultimate goal is to provide the right care, in the right place, at the right time, by the right persons, we first need to examine the settings where care is provided for frail older adults and the factors that drive transitions from one care setting to another. Therefore, we examined critical transition points in the care of older adults in home care and long-term care and compared risks for these transfers across health systems.

Confidential

## 1 2 3 **Methods (688)**

### 4 5 **Ethics**

6  
7  
8 We obtained Research Ethics approval from the University of Waterloo's Office of Research Ethics (ORE#  
9  
10 18228).

### 11 12 **Source of data**

13  
14  
15 We followed the method previously detailed by Cook and colleagues<sup>17</sup> and have summarized it briefly here.  
16  
17  
18 The RAI-Home Care (RAI-HC) and RAI-MDS 2.0 for nursing homes are two of a suite of standardized  
19  
20 assessment tools developed by the interRAI consortium<sup>18-21</sup>. Ontario (ONT), Alberta (ALTA) and British  
21  
22 Columbia (BC) mandate the assessment of home care patients expected to require services for more than 60  
23  
24 days and long-term care residents with stays of 14 days or more. Each assessment contains more than 300  
25  
26 items measuring cognition, mood and behavior, informal support services, physical functioning, and other  
27  
28 patient characteristics. The assessments have multiple embedded scales such as the Activities of Daily Living  
29  
30 Hierarchy Scale<sup>22</sup>; Instrumental Activities of Daily Living Scale<sup>23</sup>; Changes in Health, End-Stage Disease, and  
31  
32 Signs and Symptoms Scale (CHESS)<sup>24, 25</sup>; Depression Rating Scale<sup>26, 27</sup>; and Cognitive Performance Scale<sup>28-30</sup>.  
33  
34  
35 The reliability and validity of the RAI 2.0 and RAI-HC as used in normal clinical practice has been  
36  
37  
38 established<sup>31, 32</sup>.  
39  
40  
41  
42  
43  
44

45 We used data from 2010 to 2016 for home care clients with a RAI HC in the province of Ontario, Alberta and  
46  
47 British Columbia and long-term care residents with a RAI 2.0 in the same provinces in addition to one  
48  
49 territory, the Yukon. We obtained linked data sets from the Canadian Institute for Health Information and  
50  
51 combined with the following data sets: (1) interRAI data RAI-MDS 2.0 and RAI-HC; (2) Discharge Abstract  
52  
53 Database (DAD) to track acute hospitalizations; (3) National Ambulatory Care Reporting System (NACRS) to  
54  
55  
56  
57  
58  
59  
60

1  
2  
3 track emergency department visits. We included linked patients (i.e., patients whose information was  
4 contained in multiple data sources) if they had (1) at least 1 consecutive follow-up assessment within the  
5 same admission episode; or (2) a date of discharge or death. Baseline assessments were defined as occurring  
6 within 14 days of admission to long-term care or home care. As mandated, follow-up RAI-MDS 2.0 and HC  
7 assessments are completed every 90 days or 6 months, respectively, or earlier in the event of major clinical  
8 changes. During the study period, some patients had multiple admissions to the home care system; these  
9 were treated as separate episodes.  
10  
11  
12  
13  
14  
15  
16  
17  
18  
19  
20  
21

22 Assessment times are reported as Time 1 ( $T_1$ ) for baseline assessment and Time 2 ( $T_2$ ) for the follow-up  
23 assessment. The CHES score is a measure of instability in health, ranging from 0 to 5 and with 0 denoting  
24 low instability and 5 denoting high instability and greater risk of death. We then stratified patients into 3  
25 different CHES categories: (1) CHES 0 scores, (2) CHES 1-2 and (3) CHES 3+, which corresponds to CHES  
26 scores of 3-5<sup>29</sup>.  
27  
28  
29  
30  
31  
32  
33  
34  
35  
36  
37  
38  
39

## 40 **Statistical methods**

41  
42  
43  
44

45 We used previously applied methods<sup>17</sup> and summarize them briefly here. Multistate processes are a  
46 powerful tool to examine changes in health status over time and identify factors that influence these  
47 changes. [Figures 1a and 1b](#) are state-space diagrams for home care and long-term care, respectively,  
48 comprised of 7 states that are defined as 3 possible CHES states (CHES = 0, 1-2, 3+) if the patient remains  
49 in home care or long-term care facility and 4 possible discharge destinations (hospital, death, long-term care  
50  
51  
52  
53  
54  
55  
56  
57  
58  
59  
60

1  
2  
3 facility/other settings and discharged from service/home care). Movement in time (for example,  $T_1$  to  $T_2$ )  
4  
5 towards a higher CHESS scores represent a decrease in health stability whereas a movement towards a lower  
6  
7 CHESS score indicates an increase in health stability. Discharge destinations are so-called absorbing states,  
8  
9 since transitioning to one of these states defines the end of the particular care episode with home care or  
10  
11 the long-term care facility.  
12  
13  
14  
15  
16  
17

18 To contribute to the analysis, all cases must have complete baseline covariate information at the time of  
19  
20 entering into home care or a long-term care facility and a completed assessment as per required schedule  
21  
22 (180 days for home care, 90 days for long-term care facilities) until discharge (the 4 absorbing states). The list  
23  
24 of covariates are listed in the legend to Tables 3 and 4.  
25  
26  
27  
28  
29

30 The statistical analyses, aimed at modeling changes in states, were based on a discrete time  
31  
32 nonhomogeneous Markov chain model, using a previously detailed method<sup>17</sup>.  
33  
34  
35  
36  
37  
38  
39  
40  
41  
42  
43  
44  
45  
46  
47  
48  
49  
50  
51  
52  
53  
54  
55  
56  
57  
58  
59  
60

## Results (681)

### *Baseline characteristics in home care and long-term-care*

Among the 416,709 elderly individuals in this study, 254,664 received home care services and 162,045 lived in long term care facilities between 2010 and 2016 (Tables 1 and 2). Overall, about 60% were female, and about 80% of patients were older than 75 years. The majority of residents in long-term facilities had “Do Not Resuscitate” advanced directives (overall 71.3%) with the greatest proportion in Alberta at 82.9% and the lowest in Ontario at 69.5% (Table 2); over a quarter of Canadian residents have “Do Not Hospitalize” directives (Table 2).

### *Characteristics influencing mortality and hospitalizations*

Figures 2 and 3 show the unadjusted 6-month rates of hospitalization, death and long-term care placement for home care, and the unadjusted 90-day hospitalization and death rates for long-term care, by CHES score and provinces. In both settings, higher CHES scores are consistently associated with higher hospitalization and mortality rates (except for the highest CHES score in British Columbia home care). However, there are regional variations in these rates within CHES scores.

We initially examined individual characteristics to determine if they explained some of the differences observed in transitions between CHES states, as well as discharges including hospitalization and mortality. Several of the covariates were associated with differential transition rates. For example, increased age consistently increases the risk of death, irrespective of the CHES score, in both long-term care (from 1.4 to 4.0 at CHES=0, when compared to the lowest age range) and home care services (from 1.0 to 2.8 at CHES=0, when compared to the lowest age range; Supplemental Table 1). Diagnoses of COPD (at the lower CHES scores) and pneumonia (especially in long-term care) also increase the risk of death and transfer to hospital (Supplemental Table 1).

### *Provincial variations in home care and long-term care*



1  
2  
3 We next examined whether we could observe differences in care patterns across the provinces, with emphasis on  
4 mortality and hospitalizations that involve active decisions by care providers and can be modulated by advanced  
5 directives. We compared Alberta and British Columbia to Ontario. Irrespective of CHES score, patients in home care in  
6 Alberta have increased odds of being admitted to hospital when compared to Ontario (Table 3). Indeed, at a CHES  
7 score of 0, the adjusted odds ratio was 2.08 [1.92-2.24] while at CHES score of 3 or more, the adjusted odds ratio was  
8 3.77 (3.24-4.40) in Alberta when compared to Ontario (Table 3). Similarly, in British Columbia, patients in home care  
9 had increased odds of being admitted to a hospital irrespective of the initial CHES score (Table 3); at a CHES score of  
10 0, the adjusted odd ratio was 1.46 (1.39-1.54). Adjusted odds ratios for mortality were higher in Alberta and lower in  
11 British Columbia, when compared to Ontario (Table 3). As noted, these effects were adjusted for about 20 other  
12 covariates including demographic, diagnostic, and clinical indicators. In both provinces, the odds ratios for long term  
13 care admissions from home care were considerably lower than in Ontario.  
14  
15  
16  
17  
18  
19  
20  
21  
22  
23  
24  
25  
26  
27

28 In long-term care (Table 4), we note that patients in Alberta had less than half the odds of going to hospital compared  
29 to Ontario, regardless of baseline severity of illness. For example, at CHES scores of 3 or more, the adjusted odds ratio  
30 was of 0.39 (0.34-0.43). The situation was very similar in British Columbia, with an adjusted odds ratio of 0.33 (0.29-  
31 0.37) of being admitted to hospital when compared to Ontario (Table 4). Mortality rates were more nuanced, with  
32 higher mortality at the lower CHES score of 0 in Alberta and British Columbia, but lower adjusted odds ratio at the  
33 higher CHES scores (Table 4).  
34  
35  
36  
37  
38  
39  
40  
41  
42

43 Alberta has substantially increased its emphasis on assisted living as a form of residential care, so it is not surprising to  
44 see considerably greater odds of transfers to other care settings in that province (2.31 [1.93-2.77] at CHES=0; Table 4)  
45 compared with Ontario. Those odds were generally lower in British Columbia. Finally, being discharged home from  
46 long-term care was a rare event, but it was least likely to occur in British Columbia after adjusting for other covariates  
47 (Table 4).  
48  
49  
50  
51  
52  
53  
54  
55  
56  
57  
58  
59  
60

### 1 2 3 **Interpretation (792)** 4 5

6 Overall, we identified substantial inter-provincial variations in hospitalizations for patients using home care  
7 services or living in long-term care. In Ontario, long-term care residents had more than twice the odds of  
8 being transferred to hospital, independent of all other factors compared to Alberta and British Columbia. In  
9 contrast, persons making use of home care services in Alberta and British Columbia were *more* likely to be  
10 hospitalized regardless of their underlying severity of illness and other factors compared to Ontario. In both  
11 Alberta and British Columbia, home care clients were also less likely to be admitted to long-term care  
12 facilities than in Ontario.  
13  
14  
15  
16  
17  
18  
19  
20  
21  
22  
23

24 Our multistate model approach allowed us to simultaneously consider patients who transition from one  
25 health state at baseline to another state ( better or worse in care setting, transferred to another care setting,  
26 or deceased), all the while considering a number of important individual, facility and system characteristics.  
27 While certain conditions, such as heart failure and pneumonia, were associated with increased transfer to  
28 hospital from either long-term care or home care services, these differences did not explain the large  
29 regional variations. Indeed, the health system itself, that is the province, remained one the most important  
30 drivers of decisions to transfer patients. Local practice patterns played an important role and suggest that  
31 system-based considerations such as the distribution of resources were dominant factors in determining  
32 care and access to services rather than diagnostic and clinical factors or patient desires. These results are in  
33 agreement with previous work suggesting that care decisions such as hospitalization are being driven by  
34 differing care patterns and resources rather than the best outcome for patients<sup>33, 34</sup>.  
35  
36  
37  
38  
39  
40  
41  
42  
43  
44  
45  
46  
47  
48  
49  
50

51 Even though we documented a high rate of “Do Not Resuscitate” and “Do Not Hospitalize” orders on the  
52 medical records, and orders did decrease transfer rates, they did not account for 2-fold differences between  
53  
54  
55  
56  
57  
58  
59  
60

1  
2  
3 jurisdictions. Thus, to provide care better aligned with evidence and wishes, a much more active approach to  
4  
5 involvement and engagement of patients and their significant others should be considered. In addition,  
6  
7 advance care plans should be properly communicated to all caregivers and health professionals who have  
8  
9 access to all necessary resources to execute patient-centered plans.  
10  
11

12  
13 At a population level, a doubling in the odds of transfers in one jurisdiction compared to another represents  
14  
15 sending a large number of patients to hospital. Inappropriate transfers to acute care settings can be very  
16  
17 costly monetarily and can strain limited healthcare resources. With over 75,000 patients living in long-term  
18  
19 care in Ontario, a doubling of hospital transfers will result in augmented use of emergency, acute care and  
20  
21 critical care services which could overwhelm services, especially during periods of high occupancy such as flu  
22  
23 season. Worse still, for long-term care residents who are known to have a limited life expectancy, aggressive  
24  
25 care may be completely inappropriate and not even respect their wishes; iatrogenic complications from the  
26  
27 acute care episode may also lead to reduced quality of life. On the other hand, it is possible that provinces  
28  
29 with half the number of transfers are not providing acute medical services to patients who would benefit  
30  
31 from such care, particularly for patients with lower severity of illness. In either scenario, services could be  
32  
33 misaligned with patients' wishes or need.  
34  
35  
36  
37  
38  
39  
40

41 One of the strengths of this study was the use of multistage modelling to examine a complex system wide  
42  
43 process. Our approach may be used to monitor the implementation of system wide initiatives using transfer  
44  
45 rates and mortality as outcomes. Indeed, the analytic approach may be adapted to facilitate stepwise  
46  
47 comparisons of interventions. It also demonstrates the importance of taking into account confounding  
48  
49 variables related to differences in patient characteristics that may mask the true magnitude of regional  
50  
51 differences. We were unable to identify other studies examining care of frail older adults using comparable  
52  
53 statistical methods.  
54  
55  
56  
57  
58  
59  
60

1  
2  
3 Our study has limitations. Despite the use of advanced modelling techniques, our approach may not have  
4 fully captured the nuances of complex care and systems. The use of administrative data on hospitalization  
5  
6 may have also resulted in misclassifications of diagnoses or transitions. However, the interRAI assessments  
7  
8 are based on direct clinical observations by trained health professionals done at the point of care. Further,  
9  
10 data are not continuous in this study and represent snapshots at different points in time. These snapshots  
11  
12 may not be an accurate reflection of patient status at the moment that transfer decisions have been made.  
13  
14 However, we do not expect that these limitations could have accounted for these large differences in rates  
15  
16 of transfer to hospitals or mortality between provinces.  
17  
18  
19  
20  
21  
22

23 In conclusion, our study highlights substantial variations in transfer rates suggesting organizational concerns  
24  
25 or care gaps. Clearly, health systems should strive to align healthcare delivery with meeting the actual needs  
26  
27 and wishes of this vulnerable population.  
28  
29  
30  
31  
32  
33  
34  
35  
36  
37  
38  
39  
40  
41  
42  
43  
44  
45  
46  
47  
48  
49  
50  
51  
52  
53  
54  
55  
56  
57  
58  
59  
60

1  
2  
3 **REFERENCES**  
4  
5

- 6  
7 1. Heckman GA, Hillier L, Manderson B, McKinnon-Wilson J, Santi SM, Stolee P. Developing an integrated system  
8 of care for frail seniors. *Health Manage Forum*. Winter 2013;26(4):200-208.  
9  
10 2. Kripalani S, Jackson AT, Schnipper JL, Coleman EA. Promoting effective transitions of care at hospital discharge:  
11 a review of key issues for hospitalists. *J Hosp Med*. Sep 2007;2(5):314-323.  
12  
13 3. Wagner EH, Austin BT, Von Korff M. Organizing care for patients with chronic illness. *Milbank Q*.  
14 1996;74(4):511-544.  
15  
16 4. Wagner EH, Davis C, Schaefer J, Von Korff M, Austin B. A survey of leading chronic disease management  
17 programs: are they consistent with the literature? *Manag Care Q*. Summer 1999;7(3):56-66.  
18  
19 5. Doran D, Hirdes JP, Blais R, et al. Adverse events associated with hospitalization or detected through the RAI-  
20 HC assessment among Canadian home care clients. *Healthcare policy = Politiques de sante*. Aug 2013;9(1):76-  
21 88.  
22  
23 6. Doran DM, Hirdes JP, Blais R, et al. Adverse events among Ontario home care clients associated with  
24 emergency room visit or hospitalization: a retrospective cohort study. *BMC health services research*. Jun 22  
25 2013;13:227.  
26  
27 7. Costa AP, Hirdes JP; Bell C, et al. The DIVERT Scale: A Method to Identify the Probability of Unplanned  
28 Emergency Department Use among Frail Community Dwelling Seniors. *J Am Ger Soc*, Apr 2015; 63(4) 763–769.  
29 2015.  
30  
31 8. Adams LY, Koop P, Quan H, Norris C. A population-based comparison of the use of acute healthcare services by  
32 older adults with and without mental illness diagnoses. *J Psychiatr Ment Health Nurs*. Feb 2015;22(1):39-46.  
33  
34 9. CIHI. CCRS Profile of Residents in Continuing Care Facilities 2014-2015. Secondary CCRS Profile of Residents in  
35 Continuing Care Facilities 2014-2015. [https://www.cihi.ca/en/ccrs-profile-of-residents-in-continuing-care-](https://www.cihi.ca/en/ccrs-profile-of-residents-in-continuing-care-facilities-2014-2015-0)  
36 [facilities-2014-2015-0](https://www.cihi.ca/en/ccrs-profile-of-residents-in-continuing-care-facilities-2014-2015-0). Accessed April 13, 2018.  
37  
38 10. Canadian Cancer Society's Advisory Committee on Cancer Statistics. Canadian Cancer Statistics 2017. Toronto,  
39 ON: Canadian Cancer Society; 2017.  
40 [http://www.cancer.ca/~media/cancer.ca/CW/publications/Canadian%20Cancer%20Statistics/Canadian-](http://www.cancer.ca/~media/cancer.ca/CW/publications/Canadian%20Cancer%20Statistics/Canadian-Cancer-Statistics-2017-EN.pdf)  
41 [Cancer-Statistics-2017-EN.pdf](http://www.cancer.ca/~media/cancer.ca/CW/publications/Canadian%20Cancer%20Statistics/Canadian-Cancer-Statistics-2017-EN.pdf). Accessed April 13, 2018)  
42  
43 11. Gruneir A, Bell CM, Bronskill SE, Schull M, Anderson GM, Rochon PA. Frequency and pattern of emergency  
44 department visits by long-term care residents--a population-based study. *Journal of the American Geriatrics*  
45 *Society*. Mar 2010;58(3):510-517.  
46  
47 12. Boumendil A, Guidet B. Elderly patients and intensive care medicine. *Intensive Care Med*. Jul 2006;32(7):965-  
48 967.  
49  
50 13. Canada: global leadership on health. *Lancet*. 2018;Series from the Lancet Journal, Feb 24, 2018.  
51  
52 14. Statistics Canada. 2011 Census data. [http://www12.statcan.gc.ca/census-recensement/2011/as-sa/98-312-](http://www12.statcan.gc.ca/census-recensement/2011/as-sa/98-312-x/98-312-x2011003_4-eng.cfm#bx2)  
53 [x/98-312-x2011003\\_4-eng.cfm#bx2](http://www12.statcan.gc.ca/census-recensement/2011/as-sa/98-312-x/98-312-x2011003_4-eng.cfm#bx2)., Accessed April 13, 2018.  
54  
55 15. Statistics Canada. <http://www.statcan.gc.ca/pub/89-652-x/89-652-x2014002-eng.htm>., Accessed April 13,  
56 2018.  
57  
58 16. Ontario Long Term Care Association, This is long-term care 2016..  
59 <http://www.oltca.com/OLTCA/Documents/Reports/TILTC2016.pdf>. Accessed April 13, 2018.  
60  
61 17. Cook RJ, Berg K, Lee KA, Poss JW, Hirdes JP, Stolee P. Rehabilitation in home care is associated with functional  
62 improvement and preferred discharge. *Arch Phys Med Rehabil*. Jun 2013;94(6):1038-1047.  
63  
64 18. Morris JN, Fries BE, Steel K, et al. Comprehensive clinical assessment in community setting: applicability of the  
65 MDS-HC. *J Am Geriatr Soc*. Aug 1997;45(8):1017-1024.  
66  
67 19. Gray LC, Berg K, Fries BE, et al. Sharing clinical information across care settings: the birth of an integrated  
68 assessment system. *BMC Health Serv Res*. Apr 29 2009;9:71.

1  
2  
3  
4  
5  
6  
7  
8  
9  
10  
11  
12  
13  
14  
15  
16  
17  
18  
19  
20  
21  
22  
23  
24  
25  
26  
27  
28  
29  
30  
31  
32  
33  
34  
35  
36  
37  
38  
39  
40  
41  
42  
43  
44  
45  
46  
47  
48  
49  
50  
51  
52  
53  
54  
55  
56  
57  
58  
59  
60

20. Hirdes JP, Fries BE, Morris JN, et al. Integrated health information systems based on the RAI/MDS series of instruments. *Healthc Manage Forum*. Winter 1999;12(4):30-40.
21. Hirdes JP, Ljunggren G, Morris JN, et al. Reliability of the interRAI suite of assessment instruments: a 12-country study of an integrated health information system. *BMC Health Serv Res*. Dec 30 2008;8:277.
22. Morris JN, Fries BE, Morris SA. Scaling ADLs within the MDS. *J Gerontol A Biol Sci Med Sci*. Nov 1999;54(11):M546-553.
23. Morris JN, Caldarelli H, Berg K, Jones RN. Outcome measures for use with home care clients. *Canadian Journal on Aging/La Revue canadienne du vieillissement*. 2000;19(S2):87-105.
24. Hirdes JP, Frijters DH, Teare GF. The MDS-CHESS scale: a new measure to predict mortality in institutionalized older people. *J Am Geriatr Soc*. Jan 2003;51(1):96-100.
25. Hirdes JP, Poss JW, Mitchell L, Korngut L, Heckman G. Use of the interRAI CHESS scale to predict mortality among persons with neurological conditions in three care settings. *PLoS One*. 2014;9(6):e99066.
26. Burrows AB, Morris JN, Simon SE, Hirdes JP, Phillips C. Development of a minimum data set-based depression rating scale for use in nursing homes. *Age Ageing*. Mar 2000;29(2):165-172.
27. Szczerbinska K, Hirdes JP, Zyczkowska J. Good news and bad news: depressive symptoms decline and undertreatment increases with age in home care and institutional settings. *Am J Geriatr Psychiatry*. Dec 2012;20(12):1045-1056.
28. Morris JN, Fries BE, Mehr DR, et al. MDS Cognitive Performance Scale. *J Gerontol*. Jul 1994;49(4):M174-182.
29. Landi F, Tua E, Onder G, et al. Minimum data set for home care: a valid instrument to assess frail older people living in the community. *Med Care*. Dec 2000;38(12):1184-1190.
30. Morris JN, Howard EP, Steel K, et al. Updating the Cognitive Performance Scale. *J Geriatr Psychiatry Neurol*. Jan 2016;29(1):47-55.
31. Hirdes JP, Poss JW, Caldarelli H, et al. An evaluation of data quality in Canada's Continuing Care Reporting System (CCRS): secondary analyses of Ontario data submitted between 1996 and 2011. *BMC Med Inform Decis Mak*. Feb 26 2013;13:27.
32. Hogeveen SE, Chen J, Hirdes JP. Evaluation of data quality of interRAI assessments in home and community care. *BMC Med Inform Decis Mak*. Oct 30 2017;17(1):150.
33. Ouslander JG, Berenson RA. Reducing unnecessary hospitalizations of nursing home residents. *N Engl J Med*. Sep 29 2011;365(13):1165-1167.
34. Ackerly DC, Grabowski DC. Post-acute care reform--beyond the ACA. *N Engl J Med*. Feb 20 2014;370(8):689-691.

**Table 1. Baseline characteristics of 254,664 patients who received home care services**

| Covariate      | Domain                                | Province          |               |               |               | Over all<br>(n=254,664) |
|----------------|---------------------------------------|-------------------|---------------|---------------|---------------|-------------------------|
|                |                                       | ON<br>(n=194,094) | BC (n=46,359) | AB (n=13,983) | YT<br>(n=228) |                         |
| Age Group      | 65≤Age <75                            | 43941 (23)        | 6592 (14)     | 2838 (20)     | 69 (30)       | 53440 (21)              |
|                | 75 ≤ Age <85                          | 83866 (43)        | 18767 (40)    | 5925 (42)     | 107 (47)      | 108665 (43)             |
|                | 85 ≤ Age <95                          | 61763 (33)        | 19181 (41)    | 4885 (35)     | 50 (22)       | 85879 (34)              |
|                | 95 ≤Age                               | 4524 (2)          | 1819 (4)      | 335 (2)       | 2 (1)         | 6680 (3)                |
| Gender         | Female                                | 115723 (60)       | 27749 (60)    | 8331 (60)     | 122 (54)      | 151925 (60)             |
| Marital Status | Married                               | 88506 (46)        | 16049 (35)    | NA            | 70 (31)       | 104625/<br>240680 (43)  |
| CHESS          | 0                                     | 32708 (17)        | 10842 (23)    | 4642 (33)     | 79 (35)       | 48271 (19)              |
|                | 1                                     | 60761 (31)        | 14031 (30)    | 4186 (30)     | 71 (31)       | 79049 (31)              |
|                | 2                                     | 57666 (30)        | 12781 (28)    | 3111 (23)     | 44 (19)       | 73602 (29)              |
|                | 3                                     | 33266 (17)        | 6284 (14)     | 1547 (11)     | 24 (11)       | 41121 (16)              |
|                | 4                                     | 9030 (5)          | 2165 (5)      | 456 (3)       | 9 (4)         | 11660 (5)               |
|                | 5                                     | 663 (0)           | 256 (1)       | 41 (0)        | 1 (0)         | 961 (0)                 |
| Diagnoses      | Congestive Heart Failure              | 22860 (12)        | 6763 (15)     | 2026 (14)     | 18 (8)        | 31667 (12)              |
|                | Chronic obstructive pulmonary disease | 33603 (17)        | 8177 (18)     | 2850 (20)     | 53 (23)       | 44683 (18)              |
|                | Pneumonia                             | 6566 (3)          | 835 (2)       | 447 (3)       | 6 (3)         | 7854 (3)                |
|                | Diabetes                              | 51006 (26)        | 10172 (22)    | 3408 (24)     | 54 (24)       | 64640 (25)              |
|                | Arthritis                             | 89113 (46)        | 17804 (38)    | 6617 (47)     | 112 (49)      | 113646 (45)             |
|                | Renal Infection                       | 13803 (7)         | 5290 (11)     | 1099 (8)      | 6 (3)         | 20198 (8)               |
|                | Urinary track infection               | 10724 (6)         | 2322 (5)      | 903 (6)       | 8 (4)         | 13957 (5)               |
|                | Dementia                              | 41128 (21)        | 17234 (37)    | 3620 (26)     | 51 (22)       | 62033 (24)              |
|                | Depression                            | 22388 (12)        | 7237 (16)     | 1906 (14)     | 16 (7)        | 31547 (12)              |
|                | Cancer                                | 34531 (18)        | 5593 (12)     | 1971 (14)     | 37 (16)       | 42132 (17)              |
| Nurse Visits   | in the last 7 days                    | 54906 (28)        | 5942 (13)     | 4043 (29)     | 46 (20)       | 64937 (25)              |

|                                                           |             |             |            |            |          |             |
|-----------------------------------------------------------|-------------|-------------|------------|------------|----------|-------------|
|                                                           | Scale = 0   | 75913 (39)  | 11198 (24) | 6241 (45)  | 98 (43)  | 93450 (37)  |
| <b>Cognitive Performance Scale</b>                        | Scale = 1,2 | 98933 (51)  | 26766 (58) | 6390 (46)  | 108 (47) | 132197 (52) |
|                                                           | Scale = 3,4 | 14340 (7)   | 6612 (14)  | 1010 (7)   | 21 (9)   | 21983 (9)   |
|                                                           | Scale = 5,6 | 4908 (3)    | 1783 (4)   | 342 (2)    | 1 (0)    | 7034 (3)    |
| <b>Activities of Daily Living Hierarchy Scale</b>         | Scale = 0   | 119003 (61) | 27841 (60) | 10759 (77) | 190 (83) | 157793 (62) |
|                                                           | Scale = 1,2 | 53350 (27)  | 12647 (27) | 2343 (17)  | 28 (12)  | 68368 (27)  |
|                                                           | Scale >=3   | 21741 (11)  | 5871 (13)  | 881 (6)    | 10 (4)   | 28503 (11)  |
| <b>Activities of Daily Living Functional improvements</b> | Yes         | 61273 (32)  | 11045 (24) | 3869 (28)  | 73 (32)  | 76260 (30)  |

Proportions (percentages) are presented in brackets

Confidential



**Table 2. Baseline characteristics of 162,045 patients living in long-term care facilities**

| Covariate                   | Domain                                | Province       |               |               | Over all<br>(n=162,045) |
|-----------------------------|---------------------------------------|----------------|---------------|---------------|-------------------------|
|                             |                                       | ON (n=113,552) | BC (n=22,732) | AB (n=25,761) |                         |
| Age Group                   | 65≤Age <75                            | 12317 (11)     | 2409 (11)     | 2980 (12)     | 17706 (11)              |
|                             | 75 ≤ Age <85                          | 41164 (36)     | 7783 (34)     | 8874 (34)     | 57821 (36)              |
|                             | 85 ≤ Age <95                          | 52842 (47)     | 10771 (47)    | 11844 (46)    | 75457 (47)              |
|                             | 95 ≤Age                               | 7229 (6.4)     | 1769 (8)      | 2063 (8)      | 11061 (7)               |
| Gender                      | Female                                | 74023 (65)     | 14407 (63)    | 15966 (62)    | 104396 (64)             |
| Marital Status              | Married                               | 35651 (31)     | 6666 (29)     | NA            | 42317/136284<br>(31)    |
| Diagnoses                   | Congestive Heart Failure              | 16504 (15)     | 3626 (16)     | 4701 (18)     | 24831 (15)              |
|                             | Chronic obstructive pulmonary disease | 18375 (16)     | 3374 (15)     | 5291 (21)     | 27040 (17)              |
|                             | Pneumonia                             | 2103 (2)       | 347 (2)       | 566 (2)       | 3016 (2)                |
|                             | Diabetes                              | 29677 (26)     | 4739 (21)     | 6079 (24)     | 40495 (25)              |
|                             | Arthritis                             | 46807 (41)     | 6753 (30)     | 9371 (36)     | 62931 (39)              |
|                             | Renal Infection                       | 11791 (10)     | 2769 (12)     | 2755 (11)     | 17315 (11)              |
|                             | Urinary track infection               | 9758 (9)       | 1883 (8)      | 3108 (12)     | 14749 (9)               |
|                             | Dementia                              | 70244 (62)     | 14521 (64)    | 15597 (61)    | 100362 (62)             |
|                             | Depression                            | 25913 (23)     | 4308 (19)     | 7223 (28)     | 37444 (23)              |
| Cancer                      | 12060 (11)                            | 2246 (10)      | 2666 (10)     | 16972 (11)    |                         |
| CHES                        | 0                                     | 55901 (49)     | 13431 (59)    | 9081 (35)     | 78413 (48)              |
|                             | 1                                     | 36206 (32)     | 5882 (26)     | 8034 (31)     | 50122 (31)              |
|                             | 2                                     | 15305 (13)     | 2431 (11)     | 5425 (21)     | 23161 (14)              |
|                             | 3                                     | 4552 (4)       | 735 (3)       | 2257 (9)      | 7544 (5)                |
|                             | 4                                     | 1363 (1)       | 213 (1)       | 877 (3)       | 2453 (2)                |
|                             | 5                                     | 225 (0)        | 40 (0)        | 87 (0)        | 352 (0)                 |
| Physician Examination       | In last 14 days                       | 96057 (85)     | 11708 (52)    | 21038 (82)    | 128803 (80)             |
| Cognitive Performance Scale | Scale = 0                             | 14444 (13)     | 2134 (9)      | 1930 (7)      | 18508 (11)              |
|                             | Scale = 1,2                           | 41830 (37)     | 8100 (36)     | 8214 (33)     | 58144 (36)              |
|                             | Scale = 3,4                           | 46466 (41)     | 9464 (42)     | 11640 (45)    | 67570 (42)              |

|                                                           |                    |            |             |            |             |
|-----------------------------------------------------------|--------------------|------------|-------------|------------|-------------|
|                                                           | Scale = 5,6        | 10812 (10) | 3034 (13)   | 3977 (15)  | 17823 (11)  |
|                                                           | Scale = 0          | 5238 (4.6) | 2298 (10.1) | 517 (2)    | 8053 (5)    |
| <b>Activities of Daily Living Hierarchy Scale</b>         | Scale = 1,2        | 29518 (26) | 8157 (36)   | 5441 (21)  | 43116 (27)  |
|                                                           | Scale >=3          | 78796 (69) | 12277 (54)  | 19803 (77) | 110876 (68) |
| <b>Activities of Daily Living Functional Improvements</b> | Yes                | 27578 (24) | 5930 (26)   | 6890 (27)  | 40398 (25)  |
| <b>Advanced directives</b>                                | Do Not Hospitalize | 26679 (25) | 4557 (24)   | 4664 (31)  | 35900 (26)  |
|                                                           | Do Not Resuscitate | 74464 (70) | 13982 (72)  | 12360 (83) | 100806 (71) |
| <b>Facility Size</b>                                      | 1-49 beds          | 3764 (3)   | 1426 (6)    | 2468 (10)  | 7658 (5)    |
|                                                           | 50-99 beds         | 27656 (24) | 7046 (31)   | 6363 (25)  | 41065 (25)  |
|                                                           | 100_149 beds       | 57147 (50) | 6559 (29)   | 11123 (43) | 74829 (46)  |
|                                                           | 150+ beds          | 24985 (22) | 7701 (34)   | 5807 (23)  | 38493 (24)  |

Proportions (%) are presented in brackets

**Table 3. Effect of province on home care transitions (ref=Ontario): Adjusted odds ratios\* (95% CL) for transition from baseline CHESS\*\* state in home care at T<sub>1</sub> to other CHESS state (if stayed in home care), hospital, death, long-term care or other setting\*\*\* at 6-month follow-up (T<sub>2</sub>)**

|                                                 |     | Transitions at follow-up (T <sub>2</sub> ) |                         |                         |                            |                         |                                      |                         |
|-------------------------------------------------|-----|--------------------------------------------|-------------------------|-------------------------|----------------------------|-------------------------|--------------------------------------|-------------------------|
|                                                 |     | Remained in Home Care<br>CHESS Score       |                         |                         | Admitted<br>to<br>Hospital | Died                    | Admitted<br>to Long-<br>term<br>Care | Other                   |
|                                                 |     | 0                                          | 1-2                     | 3+                      |                            |                         |                                      |                         |
| <b>Alberta (ref=Ontario)</b>                    |     |                                            |                         |                         |                            |                         |                                      |                         |
| CHESS Score<br>at baseline<br>(T <sub>1</sub> ) | 0   | --                                         | 0.82<br>(0.75-<br>0.90) | ns                      | 2.08<br>(1.92-<br>2.24)    | 1.80<br>(1.48-<br>2.20) | 0.26<br>(0.18-<br>0.36)              | 0.67<br>(0.62-<br>0.72) |
|                                                 | 1-2 | 1.85<br>(1.71-<br>2.00)                    | --                      | ns                      | 2.44<br>(2.30-<br>2.59)    | 2.11<br>(1.84-<br>2.42) | 0.42<br>(0.35-<br>0.49)              | 1.14<br>(1.07-<br>1.21) |
|                                                 | 3+  | 4.83<br>(3.82-<br>6.12)                    | 1.80<br>(1.51-<br>2.16) | --                      | 3.77<br>(3.24-<br>4.40)    | 2.63<br>(2.09-<br>3.32) | ns                                   | 2.67<br>(2.26-<br>3.16) |
| <b>British Columbia (ref=Ontario)</b>           |     |                                            |                         |                         |                            |                         |                                      |                         |
| CHESS Score<br>at baseline<br>(T <sub>1</sub> ) | 0   | --                                         | 1.44<br>(1.38-<br>1.51) | 1.98<br>(1.80-<br>2.18) | 1.46<br>(1.39-<br>1.54)    | 0.46<br>(0.37-<br>0.56) | 0.55<br>(0.48-<br>0.62)              | 0.31<br>(0.30-<br>0.33) |
|                                                 | 1-2 | 1.67<br>(1.60-<br>1.73)                    | --                      | 1.45<br>(1.39-<br>1.52) | 1.39<br>(1.35-<br>1.43)    | 0.54<br>(0.49-<br>0.60) | 0.76<br>(0.72-<br>0.81)              | 0.62<br>(0.60-<br>0.64) |
|                                                 | 3+  | 3.13<br>(2.81-<br>3.48)                    | 1.39<br>(1.30-<br>1.48) | --                      | 1.28<br>(1.21-<br>1.35)    | 0.39<br>(0.34-<br>0.45) | 0.85<br>(0.78-<br>0.93)              | 1.53<br>(1.44-<br>1.63) |

\* Multi-state transition models adjusted for: home nursing visits, age, gender, marital status, ADL Hierarchy scale score, Cognitive Performance Scale score, diagnosis (binary variables for COPD, pneumonia, diabetes, arthritis, renal failure, UTI, ADRD, heart failure, cancer, depression), facility size, day of stay, functional improvement potential

\*\* Changes in Health, End-stage disease, Signs and Symptoms (CHESS) scale is a measure of instability in health; higher scores indicate greater instability

\*\*\* Other settings typically involved discontinuation of home care services (i.e., discharge from the program)

**Table 4. Effect of province on long-term care facility transitions (ref=Ontario): Adjusted odds ratios\* for transition from baseline CHESS\*\* state in long-term care at T<sub>1</sub> to other CHESS state (if remained in long-term care), hospital, death, other setting\*\*\* or home at 90-day follow-up (T<sub>2</sub>)**

|                                                    |     | Transitions at follow-up (T <sub>2</sub> ) |                         |                         |                            |                         |                                |                     |
|----------------------------------------------------|-----|--------------------------------------------|-------------------------|-------------------------|----------------------------|-------------------------|--------------------------------|---------------------|
|                                                    |     | Remained in Long-term Care<br>CHESS Score  |                         |                         | Admitted<br>to<br>Hospital | Died                    | Discharged<br>Other<br>Setting | Discharged<br>Home  |
|                                                    |     | 0                                          | 1-2                     | 3+                      |                            |                         |                                |                     |
| <b>Alberta (ref=Ontario)</b>                       |     |                                            |                         |                         |                            |                         |                                |                     |
| CHESS<br>Score at<br>baseline<br>(T <sub>1</sub> ) | 0   | --                                         | 1.43<br>(1.37-<br>1.48) | 2.02<br>(1.83-<br>2.23) | 0.38<br>(0.35-<br>0.40)    | 1.21<br>(1.09-<br>1.36) | 2.31<br>(1.93-2.77)            | ns                  |
|                                                    | 1-2 | 0.96<br>(0.92-<br>0.99)                    | --                      | 1.46<br>(1.38-<br>1.54) | 0.39<br>(0.37-<br>0.41)    | 0.93<br>(0.87-<br>0.98) | 1.46<br>(1.24-1.71)            | ns                  |
|                                                    | 3+  | 0.76<br>(0.66-<br>0.87)                    | 0.77<br>(0.71-<br>0.85) | --                      | 0.39<br>(0.34-<br>0.43)    | 0.52<br>(0.47-<br>0.58) | ns                             | ns                  |
| <b>British Columbia (ref=Ontario)</b>              |     |                                            |                         |                         |                            |                         |                                |                     |
| CHESS<br>Score at<br>baseline<br>(T <sub>1</sub> ) | 0   | --                                         | 0.84<br>(0.77-<br>0.93) | 0.84<br>(0.77-<br>0.93) | 0.44<br>(0.42-<br>0.46)    | 1.39<br>(1.28-<br>1.51) | 0.74<br>(0.62-0.90)            | 0.50<br>(0.42-0.60) |
|                                                    | 1-2 | ns                                         | --                      | 1.15<br>(1.08-<br>1.22) | 0.51<br>(0.48-<br>0.53)    | 1.35<br>(1.27-<br>1.43) | ns                             | 0.55<br>(0.43-0.70) |
|                                                    | 3+  | 0.40<br>(0.34-<br>0.48)                    | 0.55<br>(0.50-<br>0.61) | --                      | 0.33<br>(0.29-<br>0.37)    | 0.58<br>(0.52-<br>0.65) | 0.51<br>(0.31-0.83)            | 0.52<br>(0.27-0.99) |

\*Multi-state transition models adjusted for: physician visits, age, gender, marital status, ADL Hierarchy scale score, Cognitive Performance Scale score, diagnosis (binary variables for COPD, pneumonia, diabetes, arthritis, renal failure, UTI, ADRD, heart failure, cancer, depression), facility size, Advanced directives (i.e., do not resuscitate, do not hospitalize), day of stay, functional improvement potential

\*\*Changes in Health, End-stage disease, Signs and Symptoms (CHESS) scale is a measure of instability in health; higher scores indicate greater instability

\*\*\*Other settings for transitions from nursing homes included discharges to other nursing homes, assisted living or retirement homes.

**Supplemental Table 1:** Effect of selected co-variates

| <b>AGE</b>                                          |                                |                                |                                |
|-----------------------------------------------------|--------------------------------|--------------------------------|--------------------------------|
| <b>MORTALITY</b>                                    |                                |                                |                                |
|                                                     | <b>CHESS 0</b>                 | <b>CHESS 1-2</b>               | <b>CHESS 3+</b>                |
| <b>LTCF</b>                                         |                                |                                |                                |
| 75≤Age<85 <i>versus</i><br>65≤Age <75               | 1.441 (1.258,1.651),<br><.0001 | 1.247 (1.141,1.362),<br><.0001 | 1.177 (1.01,1.372),<br>0.0369  |
| 85≤Age<95 <i>versus</i><br>65≤Age <75               | 2.306 (2.021,2.631),<br><.0001 | 1.608 (1.477,1.752),<br><.0001 | 1.413 (1.217,1.639),<br><.0001 |
| 95≤Age <i>versus</i><br>65≤Age <75                  | 4.023 (3.436,4.709),<br><.0001 | 2.111 (1.91,2.334),<br><.0001  | 1.589 (1.324,1.907),<br><.0001 |
| <b>Home care</b>                                    |                                |                                |                                |
| 75≤Age<85 <i>versus</i><br>65≤Age <75               | 0.97 (0.809,1.163),<br>0.7403  | 0.988 (0.904,1.08), 0.79       | 1.009 (0.915,1.114),<br>0.8535 |
| 85≤Age<95 <i>versus</i><br>65≤Age <75               | 1.331 (1.107,1.601),<br>0.0024 | 1.233 (1.123,1.353),<br><.0001 | 1.264 (1.137,1.404),<br><.0001 |
| 95≤Age <i>versus</i><br>65≤Age <75                  | 2.813 (2.079,3.805),<br><.0001 | 2.357 (2.02,2.75),<br><.0001   | 1.632 (1.336,1.992),<br><.0001 |
| <b>HOSPITALIZATION</b>                              |                                |                                |                                |
|                                                     | <b>CHESS 0</b>                 | <b>CHESS 1-2</b>               | <b>CHESS 3+</b>                |
| <b>LTCF</b>                                         |                                |                                |                                |
| 75≤Age<85 <i>versus</i><br>65≤Age <75               | 1.054 (1.015,1.095),<br>0.0062 | 0.955 (0.916,0.996),<br>0.0319 | 0.994 (0.857,1.153),<br>0.9388 |
| 85≤Age<95 <i>versus</i><br>65≤Age <75               | 1.091 (1.05,1.133),<br><.0001  | 0.851 (0.817,0.888),<br><.0001 | 0.831 (0.718,0.961),<br>0.0125 |
| 95≤Age <i>versus</i><br>65≤Age <75                  | 1.046 (0.983,1.112),<br>0.1539 | 0.645 (0.608,0.685),<br><.0001 | 0.567 (0.466,0.69),<br><.0001  |
| <b>Home care</b>                                    |                                |                                |                                |
| 75≤Age<85 <i>versus</i><br>65≤Age <75               | 0.944 (0.889,1.003),<br>0.0605 | 0.927 (0.897,0.958),<br><.0001 | 0.952 (0.897,1.009),<br>0.097  |
| 85≤Age<95 <i>versus</i><br>65≤Age <75               | 1.063 (0.999,1.132),<br>0.0556 | 0.985 (0.952,1.019),<br>0.3881 | 0.975 (0.915,1.038),<br>0.4212 |
| 95≤Age <i>versus</i><br>65≤Age <75                  | 1.537 (1.358,1.739),<br><.0001 | 1.17 (1.091,1.255),<br><.0001  | 0.984 (0.868,1.116),<br>0.8052 |
| <b>CHRONIC OBSTRUCTIVE PULMONARY DISEASE (COPD)</b> |                                |                                |                                |
| <b>MORTALITY</b>                                    |                                |                                |                                |
|                                                     | <b>CHESS 0</b>                 | <b>CHESS 1-2</b>               | <b>CHESS 3+</b>                |
| <b>LTCF</b>                                         |                                |                                |                                |
|                                                     | 1.51 (1.383,1.647),<br><.0001  | 1.287 (1.224,1.353),<br><.0001 | 0.953 (0.871,1.044),<br>0.3021 |
| <b>Home care</b>                                    |                                |                                |                                |
|                                                     | 1.539 (1.27,1.865),<br><.0001  | 1.187 (1.097,1.285),<br><.0001 | 0.997 (0.92,1.081),<br>0.9475  |
| <b>HOSPITALIZATION</b>                              |                                |                                |                                |

|                        |                                |                                |                                |
|------------------------|--------------------------------|--------------------------------|--------------------------------|
| <b>LTCF</b>            |                                |                                |                                |
|                        | 1.41 (1.364,1.457),<br><.0001  | 1.24 (1.204,1.277),<br><.0001  | 1.057 (0.963,1.16),<br>0.2431  |
| <b>Home care</b>       |                                |                                |                                |
|                        | 1.417 (1.323,1.517),<br><.0001 | 1.152 (1.119,1.187),<br><.0001 | 1.006 (0.961,1.053),<br>0.7966 |
| <b>PNEUMONIA</b>       |                                |                                |                                |
| <b>MORTALITY</b>       |                                |                                |                                |
|                        | CHESS 0                        | CHESS 1-2                      | CHESS 3+                       |
| <b>LTCF</b>            |                                |                                |                                |
|                        | 1.545 (1.195,1.997),<br>0.0009 | 1.814 (1.611,2.043),<br><.0001 | 2.019 (1.698,2.402),<br><.0001 |
| <b>Home care</b>       |                                |                                |                                |
|                        | 1.539 (1.27,1.865),<br><.0001  | 1.244 (1.05,1.475),<br>0.0118  | 1.197 (1.026,1.397),<br>0.0225 |
| <b>HOSPITALIZATION</b> |                                |                                |                                |
| <b>LTCF</b>            |                                |                                |                                |
|                        | 1.505 (1.343,1.685),<br><.0001 | 1.698 (1.567,1.84),<br><.0001  | 1.945 (1.624,2.33),<br><.0001  |
| <b>Home care</b>       |                                |                                |                                |
|                        | 1.417 (1.323,1.517),<br><.0001 | 1.16 (1.081,1.244),<br><.0001  | 1.13 (1.027,1.243),<br>0.0126  |

## FIGURE LEGENDS

### **Figure 1. State-space diagram for possible transitions from home care (a) and long-term (b) care in multistate Markov model.**

At admission to home care (a) or long-term care (b), clients can be in State 1 (CHESS=0), State 2 (CHESS=1-2) or State 3 (CHESS=3+), with State 3 representing the greatest disease instability and State 1, the least disease instability. From this initial state, clients that remain in home care (a) or long-term care (b) can improve [for example, a transition from State 2 to State 1, or a transition from State 3 to State 1 or 2] or can worsen [for example, transition from State 1 to State 2 or 3, or transition from State 2 to State 3]. A client can also transition out of home care (a) from one of the three initial admission states (State 1, 2 and 3) to one of four possible discharge locations: long-term care facility (State 4), discharged from home care (no longer requiring services, State 5), hospital (State 6) or death (State 7). A resident (b) can transition out of long-term care from one of the three initial admission states (State 1, 2 and 3) to one of four possible discharge locations: home (State 4), other care settings (State 5), hospital (State 6) or death (State 7).

### **Figure 2. Unadjusted rates of transitions from home care by CHESS score and by province.**

Percentage of home care clients who were admitted to long-term care, died (at home or in hospital), were admitted to hospital but did not die there within 6 months of intake assessment, by CHESS score at intake, in Ontario, Alberta and BC.

### **Figure 3. Unadjusted rates of transitions from long-term care by CHESS score and by province.**

Percentage of residents who died (in long-term care facility or hospital) or were admitted to hospital but did not die there within 90 days of admission assessment, by CHESS score at admission, in Ontario, Alberta and BC.

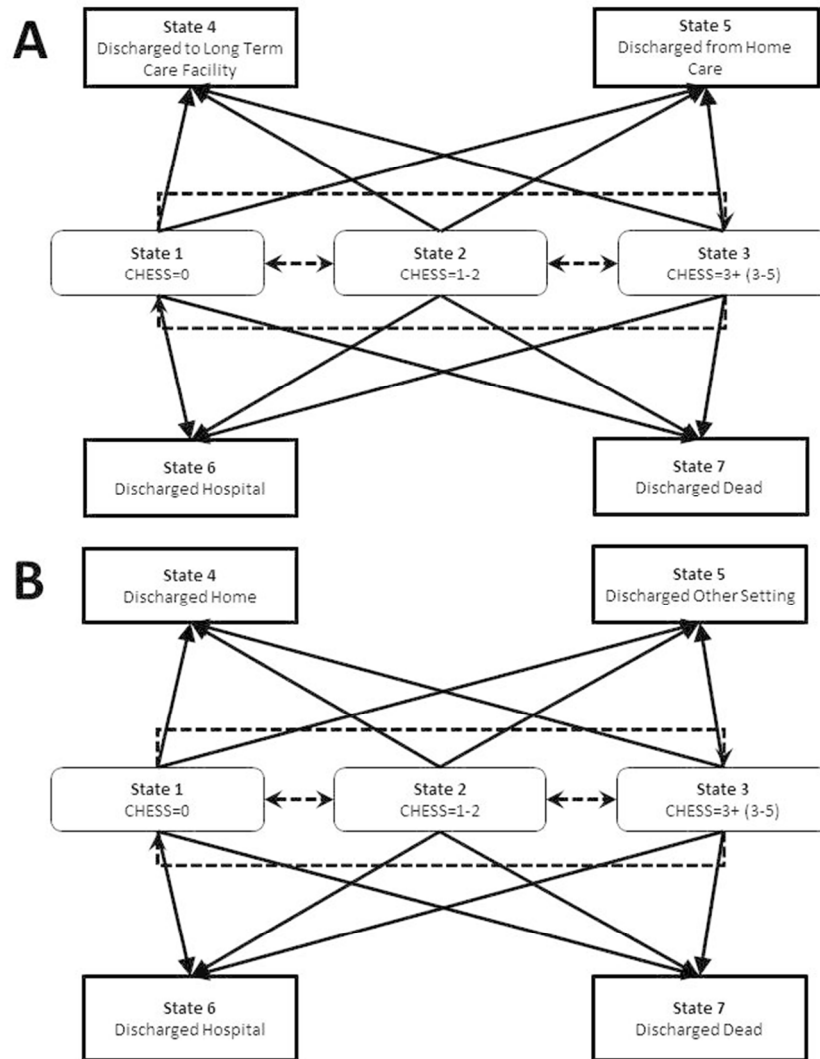

Note: Dashed lines reflect transitions between health states for those remaining in home or long term care.  
Solid lines reflect transitions to "absorbing states" outside of the home or long term care.

Figure 1. State-space diagram for possible transitions from home care (a) and long-term (b) care in multistate Markov model.

At admission to home care (a) or long-term care (b), clients can be in State 1 (CHESS=0), State 2 (CHESS=1-2) or State 3 (CHESS=3+), with State 3 representing the greatest disease instability and State 1, the least disease instability. From this initial state, clients that remain in home care (a) or long-term care (b) can improve [for example, a transition from State 2 to State 1, or a transition from State 3 to State 1 or 2] or can worsen [for example, transition from State 1 to State 2 or 3, or transition from State 2 to State 3]. A client can also transition out of home care (a) from one of the three initial admission states (State 1, 2 and 3) to one of four possible discharge locations: long-term care facility (State 4), discharged from home care (no longer requiring services, State 5), hospital (State 6) or death (State 7). A resident (b) can transition out of long-term care from one of the three initial admission states (State 1, 2 and 3) to one of four possible discharge locations: home (State 4), other care settings (State 5), hospital (State 6) or death (State 7).



1  
2  
3  
4  
5  
6  
7  
8  
9  
10  
11  
12  
13  
14  
15  
16  
17  
18  
19  
20  
21  
22  
23  
24  
25  
26  
27  
28  
29  
30  
31  
32  
33  
34  
35  
36  
37  
38  
39  
40  
41  
42  
43  
44  
45  
46  
47  
48  
49  
50  
51  
52  
53  
54  
55  
56  
57  
58  
59  
60

190x254mm (96 x 96 DPI)

Confidential

1  
2  
3  
4  
5  
6  
7  
8  
9  
10  
11  
12  
13  
14  
15  
16  
17  
18  
19  
20  
21  
22  
23  
24  
25  
26  
27  
28  
29  
30  
31  
32  
33  
34  
35  
36  
37  
38  
39  
40  
41  
42  
43  
44  
45  
46  
47  
48  
49  
50  
51  
52  
53  
54  
55  
56  
57  
58  
59  
60

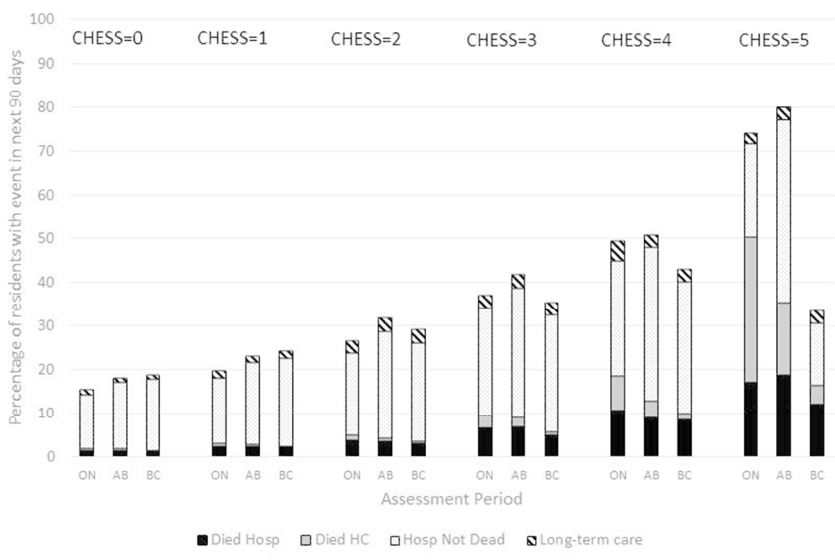

Figure 2. Unadjusted rates of transitions from home care by CHES score and by province. Percentage of home care clients who were admitted to long-term care, died (at home or in hospital), were admitted to hospital but did not die there within 6 months of intake assessment, by CHES score at intake, in Ontario, Alberta and BC.

254x190mm (96 x 96 DPI)

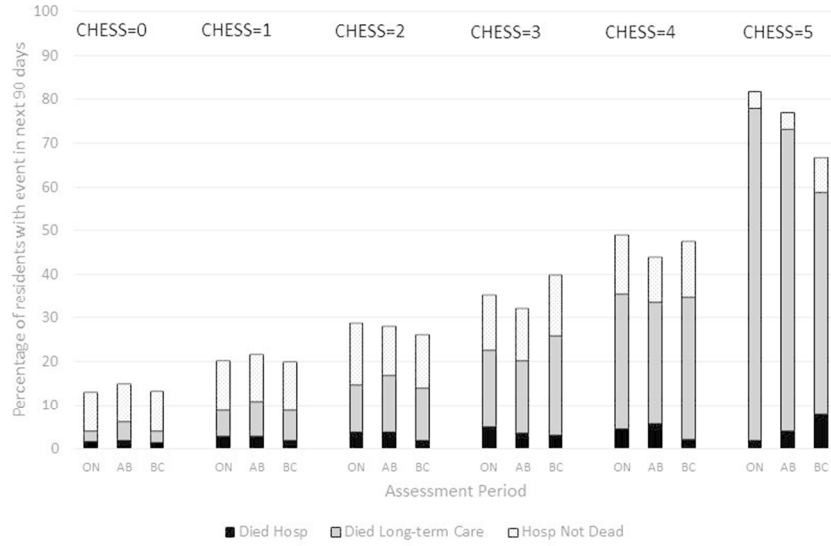

Figure 3. Unadjusted rates of transitions from long-term care by CHES score and by province. Percentage of residents who died (in long-term care facility or hospital) or were admitted to hospital but did not die there within 90 days of admission assessment, by CHES score at admission, in Ontario, Alberta and BC.

254x190mm (96 x 96 DPI)
